# Supplementary material for: Immune responses to human fungal pathogens and therapeutic prospects
Source: Springer Nature journal article supplement (doi:10.1038/s41577-022-00826-w), 2023-01-04
Supplement: MOESM1 [file 41577_2022_826_MOESM1_ESM.pdf]

# Immune responses to human fungal pathogens and therapeutic prospects

In the format provided by the  
authors and unedited

Supplementary Table 1 | **Clinical features of the most prevalent human fungal infections**

| Infection (most common fungal genera or species)                                                                                      | Fungal morphotype                                             | Clinical presentation                                              | Commonly affected patient population <sup>a</sup>                                                 | Annual global incidence      | All-cause mortality | Geographic distribution | Current principles of treatment                                                                         |
|---------------------------------------------------------------------------------------------------------------------------------------|---------------------------------------------------------------|--------------------------------------------------------------------|---------------------------------------------------------------------------------------------------|------------------------------|---------------------|-------------------------|---------------------------------------------------------------------------------------------------------|
| Mucosal candidiasis <sup>b</sup><br>( <i>Candida albicans</i> , <i>C. dubliniensis</i> , <i>C. glabrata</i> )                         | Yeast (with pseudohyphae and hyphae depending on the species) | Oropharyngeal and/or oesophageal candidiasis                       | HIV/AIDS, corticosteroids                                                                         | ~3.3 million (HIV/AIDS only) | N/A                 | Worldwide               | Topical or oral azoles; echinocandins (for azole-resistant <i>Candida</i> strains)                      |
|                                                                                                                                       |                                                               | Vaginal candidiasis                                                | Healthy women, antibiotic use                                                                     | ~138 million                 |                     |                         |                                                                                                         |
| Invasive candidiasis<br>( <i>C. albicans</i> , <i>C. glabrata</i> , <i>C. tropicalis</i> , <i>C. parapsilosis</i> , <i>C. auris</i> ) | Yeast (with pseudohyphae and hyphae depending on the species) | Candidemia                                                         | Critical illness (ICU), post-COVID-19                                                             | ~750,000                     | ~30-40%             | Worldwide               | Echinocandins; removal of central venous catheter                                                       |
|                                                                                                                                       |                                                               | Intra-abdominal candidiasis                                        | Abdominal surgery                                                                                 |                              |                     |                         |                                                                                                         |
|                                                                                                                                       |                                                               | Disseminated candidiasis (liver, spleen, CNS, kidneys, eye, heart) | Neutropenia, corticosteroids, SOT (primary abdominal organs), low-birth weight premature neonates |                              |                     |                         |                                                                                                         |
| Invasive aspergillosis<br>( <i>Aspergillus fumigatus</i> , <i>A. flavus</i> , <i>A. terreus</i> , <i>A. niger</i> )                   | Filamentous mold                                              | Pulmonary or disseminated aspergillosis                            | Neutropenia, corticosteroids, HSCT, SOT (primarily lung), post-influenza or COVID-19, ibrutinib   | ~300,000                     | ~30-50%             | Worldwide               | Voriconazole (first-line), isavuconazole or posaconazole; reduction of immunosuppression                |
|                                                                                                                                       |                                                               | Allergic bronchopulmonary aspergillosis                            | Atopic individuals                                                                                | ~5 million <sup>c</sup>      | N/A                 | Worldwide               | Itraconazole and corticosteroids                                                                        |
| Mucormycosis<br>( <i>Rhizopus</i> , <i>Mucor</i> , <i>Rhizomucor</i> )                                                                | Filamentous mold                                              | Sinopulmonary mucormycosis                                         | Neutropenia, HSCT, corticosteroids, post-COVID-19                                                 | >10,000                      | ~40-80%             | Worldwide               | Amphotericin B, posaconazole as step-down therapy; surgical debridement; reduction of immunosuppression |
|                                                                                                                                       |                                                               | Rhinocerebral mucormycosis                                         | Diabetic ketoacidosis, post-COVID-19                                                              |                              |                     |                         |                                                                                                         |

|                                                                                                                                                                                                                     |                                                                        |                                                           |                                                                                |                          |           |                                                          |                                                                                                         |
|---------------------------------------------------------------------------------------------------------------------------------------------------------------------------------------------------------------------|------------------------------------------------------------------------|-----------------------------------------------------------|--------------------------------------------------------------------------------|--------------------------|-----------|----------------------------------------------------------|---------------------------------------------------------------------------------------------------------|
|                                                                                                                                                                                                                     |                                                                        | Disseminated mucormycosis                                 | Iron overload (e.g., deferoxamine iron chelation therapy)                      |                          |           |                                                          |                                                                                                         |
|                                                                                                                                                                                                                     |                                                                        | Necrotizing skin infection                                | Direct inoculation (tornado victims)                                           |                          |           |                                                          |                                                                                                         |
| Chromoblastomycosis <sup>d</sup><br>( <i>Fonsecaea pedrosoi</i> )                                                                                                                                                   | Pigmented yeast                                                        | Skin and subcutaneous infections                          | Healthy individuals                                                            | ~10,000 <sup>c</sup>     | N/A       | Worldwide (primarily in tropical and subtropical areas)  | Itraconazole; surgical debridement                                                                      |
| Phaeohyphomycosis<br>( <i>Cladophialophora bantiana</i> , <i>Rhinocladiella mackenziei</i> , <i>Exophiala dermatitidis</i> , <i>Curvularia cunata</i> , <i>Bipolaris spicifera</i> , <i>Exserohilum rostratum</i> ) | Melanin-bearing yeast-like forms and hyphae                            | Skin and subcutaneous infections                          | Healthy individuals                                                            | Emerging but unknown     | Up to 70% | Worldwide                                                | Amphotericin B or azole therapy                                                                         |
|                                                                                                                                                                                                                     |                                                                        | CNS or disseminated infection                             | CARD9 deficiency, dectin 1 deficiency after trauma, HSCT, SOT, corticosteroids |                          |           |                                                          |                                                                                                         |
| Cryptococcosis <sup>b</sup><br>( <i>Cryptococcus neoformans</i> , <i>C. gattii</i> )                                                                                                                                | Yeast                                                                  | Pneumonia                                                 | AIDS, corticosteroids                                                          | ~223,000 (HIV/AIDS only) | ~20-70%   | Worldwide                                                | Amphotericin B (+5-flucytosine for CNS disease) followed by fluconazole; reduction of immunosuppression |
|                                                                                                                                                                                                                     |                                                                        | CNS or disseminated cryptococcosis                        | HIV/AIDS, HSCT, ibrutinib therapy                                              |                          |           |                                                          |                                                                                                         |
| Histoplasmosis <sup>b</sup><br>( <i>Histoplasma capsulatum</i> )                                                                                                                                                    | Dimorphic fungus (mold in soil, narrow-based yeast in infected tissue) | Self-limited pneumonia                                    | Healthy individuals                                                            | ~100,000 <sup>c</sup>    | ~10-50%   | Midwestern United States, Central America, the Caribbean | Amphotericin B followed by itraconazole; reduction of immunosuppression                                 |
|                                                                                                                                                                                                                     |                                                                        | Disseminated histoplasmosis (liver, bone, bone marrow)    | HIV/AIDS, SOT, corticosteroids                                                 |                          |           |                                                          |                                                                                                         |
| Blastomycosis<br>( <i>Blastomyces dermatitidis</i> )                                                                                                                                                                | Dimorphic fungus (mold in soil, broad-based yeast in infected tissue)  | Pneumonia                                                 | Healthy individuals                                                            | ~3,000 <sup>c</sup>      | <1-60%    | Midwestern and Atlantic United States                    | Amphotericin B or itraconazole; reduction of immunosuppression                                          |
|                                                                                                                                                                                                                     |                                                                        | Disseminated blastomycosis (skin, bone, mucosal surfaces, | HIV/AIDS, corticosteroids                                                      |                          |           |                                                          |                                                                                                         |

|                                                                                          |                                                                                      |                                                                  |                           |                      |           |                                 |                                                                         |
|------------------------------------------------------------------------------------------|--------------------------------------------------------------------------------------|------------------------------------------------------------------|---------------------------|----------------------|-----------|---------------------------------|-------------------------------------------------------------------------|
|                                                                                          |                                                                                      | genitourinary tract)                                             |                           |                      |           |                                 |                                                                         |
| Coccidioidomycosis <sup>b</sup><br>( <i>Coccidioides immitis</i> , <i>C. posadasii</i> ) | Dimorphic fungus (mold in soil, spherules in infected tissue)                        | Self-limited pneumonia                                           | Healthy individuals       | ~25,000 <sup>c</sup> | <1-60%    | Southwest United States, Mexico | Fluconazole or amphotericin B; reduction of immunosuppression           |
|                                                                                          |                                                                                      | Disseminated infection (CNS, bone)                               | HIV/AIDS, corticosteroids |                      |           |                                 |                                                                         |
| Paracoccidioidomycosis<br>( <i>Paracoccidioides brasiliensis</i> )                       | Dimorphic fungus (mold in soil, multipolar-budding yeast in infected tissue)         | Pneumonia                                                        | Healthy individuals       | ~15,000 <sup>c</sup> | <5%       | Latin America                   | Itraconazole, amphotericin B, or trimethoprim-sulfamethoxazole          |
|                                                                                          |                                                                                      | Disseminated infection (mucosae, skin, bone)                     | HIV/AIDS, corticosteroids |                      |           |                                 |                                                                         |
| Talaromycosis<br>( <i>Talaromyces marneffei</i> )                                        | Dimorphic fungus (mold in soil, yeast dividing by binary fission in infected tissue) | Pneumonia                                                        | Healthy individuals       | ~20,000              | ~20-30%   | Southeast Asia                  | Amphotericin B followed by itraconazole; reduction of immunosuppression |
|                                                                                          |                                                                                      | Disseminated infection (mucosae, skin, bone)                     | HIV/AIDS, corticosteroids |                      |           |                                 |                                                                         |
| Emergomycosis<br>( <i>Emergomycetes pasteurianus</i> , <i>E. africanus</i> )             | Dimorphic fungus (mold in soil, yeast in infected tissue)                            | Disseminated infection (skin, lungs, liver, spleen, bone marrow) | HIV/AIDS                  | Emerging but unknown | Up to 50% | Africa                          | Amphotericin B followed by itraconazole                                 |
| Pneumocystosis <sup>b</sup><br>( <i>Pneumocystis jirovecii</i> )                         | Cysts and trophozoites                                                               | Pneumonia                                                        | HIV/AIDS, corticosteroids | ~500,000             | ~20-80%   | Worldwide                       | Trimethoprim-sulfamethoxazole; reduction of immunosuppression           |
|                                                                                          |                                                                                      | Disseminated infection (CNS, eye, gastrointestinal tract, skin)  | HIV/AIDS                  |                      |           |                                 |                                                                         |

<sup>a</sup>At-risk conditions caused by inborn errors of immunity or administration of immune pathway-targeted biologics are presented in-depth separately in Supplementary Tables 2 and 3; <sup>b</sup>AIDS-defining illness; <sup>c</sup>Global burden of infection; <sup>d</sup>WHO neglected tropical disease; <sup>e</sup>Annual incidence of life-threatening infections; COVID-19, coronavirus disease 2019; CNS, central nervous system; HSCT, haematopoietic stem cell transplantation; ICU, intensive care unit; N/A, not applicable; SOT, solid organ transplantation.

Supplementary Table 2 | **Key human inborn errors of immunity that predispose to fungal infection**

| Gene [protein name if different] (chromosome)                                                                | Predominant cellular expression                            | OMIM no. (clinical syndrome if applicable) <sup>a</sup> | Mode of inheritance | Fungal infection susceptibility (mean frequency, when known)                                                                                                                                   | Other clinical phenotypes                                                                                                    | Diagnostic testing | Antifungal immunological defects (when known)                                                                                                                                                                                        |
|--------------------------------------------------------------------------------------------------------------|------------------------------------------------------------|---------------------------------------------------------|---------------------|------------------------------------------------------------------------------------------------------------------------------------------------------------------------------------------------|------------------------------------------------------------------------------------------------------------------------------|--------------------|--------------------------------------------------------------------------------------------------------------------------------------------------------------------------------------------------------------------------------------|
| <b><i>Inborn errors of immunity that manifest with both mucocutaneous and invasive fungal infections</i></b> |                                                            |                                                         |                     |                                                                                                                                                                                                |                                                                                                                              |                    |                                                                                                                                                                                                                                      |
| <i>CARD9</i> (9q)                                                                                            | Myeloid phagocytes and to a lesser extent epithelial cells | 212050                                                  | AR (LOF)            | CMC (~35%), CNS candidiasis (~30%), phaeohyphomycosis (~15%), extrapulmonary aspergillosis (~5%), skin mucormycosis (rare), onychomycosis (~50%), deep dermatophytosis (~40%)                  | None                                                                                                                         | Genetic sequencing | Decreased peripheral blood T <sub>H</sub> 17 cells, impaired pro-inflammatory cytokine responses by PBMC and microglia, impaired neutrophil recruitment to the CNS, impaired neutrophil killing of unopsonized <i>Candida</i> yeasts |
| <i>STAT1</i> (2q)                                                                                            | Broadly expressed                                          | 614162                                                  | AD (GOF)            | CMC (>95%), invasive candidiasis (~5%), aspergillosis (~5%), mucormycosis (rare), skin fusariosis (rare), cryptococcosis (rare), histoplasmosis (~5-10%), coccidioidomycosis (~5%), PJP (rare) | Bacterial, NTM, and viral infections, autoimmunity (thyroiditis, T1D, cytopenias, hepatitis), aneurysms, carcinomas          | Genetic sequencing | Decreased peripheral blood T <sub>H</sub> 17 cells and decreased IL-17 generation by PBMC associated with increased cellular responses to IFN $\alpha/\beta$ , IFN $\gamma$ , and IL-27                                              |
| <i>STAT3</i> (17q)                                                                                           | Broadly expressed                                          | 147060 (AD-HIES, Job's syndrome)                        | AD (DN)             | CMC (~80%), nail dermatophytosis, aspergillosis (~25%), scedosporiosis, cryptococcosis, histoplasmosis, GI tract coccidioidomycosis (rare), skin fusariosis (rare), PJP (rare)                 | Skin staphylococcal infections, bacterial pneumonias, eczema, pneumatocoles, aneurysms, skeletal abnormalities, elevated IgE | Genetic sequencing | Decreased peripheral blood T <sub>H</sub> 17 cells                                                                                                                                                                                   |

|                                |                                                                |                        |                |                                                                                        |                                                                                       |                                                                   |                                                                                                      |
|--------------------------------|----------------------------------------------------------------|------------------------|----------------|----------------------------------------------------------------------------------------|---------------------------------------------------------------------------------------|-------------------------------------------------------------------|------------------------------------------------------------------------------------------------------|
| <i>IL12RB1</i> (19p)           | Lymphoid and myeloid cells                                     | 614891 (MSMD)          | AR (LOF)       | CMC (~25%), cryptococcosis, histoplasmosis, coccidioidomycosis, paracoccidioidomycosis | <i>Salmonella</i> and NTM infections                                                  | Genetic sequencing, cell surface IL-12Rβ1 expression <sup>b</sup> | Impaired T <sub>H</sub> 17 cell differentiation, impaired IL-12– and IL-23–dependent IFNγ generation |
| <i>CD40L</i> (Xq)              | T lymphocytes                                                  | 308230 (HIGM)          | X-linked (LOF) | CMC (5-10%), cryptococcosis, histoplasmosis, PJP                                       | Bacterial, NTM, and parasitic infections, IBD                                         | Genetic sequencing, cell surface CD40L expression <sup>b</sup>    | Impaired T lymphocyte responses                                                                      |
| <i>IL2RG</i> (Xq)              | Lymphoid cells and to a lesser extent myeloid cells            | 300400 (X-linked SCID) | X-linked (LOF) | CMC, PJP                                                                               | Bacterial and viral infections, failure to thrive, GvHD                               | Genetic sequencing, NBS                                           | Severe lymphopenia                                                                                   |
| <i>IL7R</i> (5p)               | Variable (lymphoid cells and to a lesser extent myeloid cells) | 608971 (AR-SCID)       | AR (LOF)       | CMC, PJP                                                                               | Bacterial and viral infections, failure to thrive, GvHD                               | Genetic sequencing, NBS, ADA levels                               | Severe lymphopenia                                                                                   |
| <i>RAG1</i> (11p)              |                                                                | 601457 (AR-SCID)       |                |                                                                                        |                                                                                       |                                                                   |                                                                                                      |
| <i>RAG2</i> (11p)              |                                                                | 601457 (AR-SCID)       |                |                                                                                        |                                                                                       |                                                                   |                                                                                                      |
| <i>JAK3</i> (19p)              |                                                                | 600802 (AR-SCID)       |                |                                                                                        |                                                                                       |                                                                   |                                                                                                      |
| <i>ADA</i> (20q)               |                                                                | 102700 (AR-SCID)       |                |                                                                                        |                                                                                       |                                                                   |                                                                                                      |
| <i>ZAP70</i> (2q)              |                                                                | 269840 (AR-SCID)       |                |                                                                                        |                                                                                       |                                                                   |                                                                                                      |
| <i>DCLRE1C</i> [ARTEMIS] (10p) |                                                                | 602450 (AR-SCID)       |                |                                                                                        |                                                                                       |                                                                   |                                                                                                      |
| <i>IKBKG</i> (Xq)              | Broadly expressed                                              | 300291 (EDA-ID, HIGM)  | X-linked (LOF) | CMC (~10%), PJP (~10%)                                                                 | Bacterial (sinopulmonary), NTM, and viral infections, anhidrotic ectodermal dysplasia | Genetic sequencing                                                | Severe lymphopenia                                                                                   |
| <i>NFKB1A</i> [IKBA] (14q)     | Broadly expressed                                              | 612132 (EDA-ID, HIGM)  | AD (HI)        | CMC (100%), PJP (~60%)                                                                 | Bacterial (sinopulmonary) and NTM infections,                                         | Genetic sequencing                                                | Severe lymphopenia, decreased peripheral blood T <sub>H</sub> 17 cells                               |

|                                                                                            |                                                            |               |          |                                                                                        |                                                                                                                              |                    |                                                                                                                    |
|--------------------------------------------------------------------------------------------|------------------------------------------------------------|---------------|----------|----------------------------------------------------------------------------------------|------------------------------------------------------------------------------------------------------------------------------|--------------------|--------------------------------------------------------------------------------------------------------------------|
|                                                                                            |                                                            |               |          |                                                                                        | anhidrotic ectodermal dysplasia, IBD                                                                                         |                    |                                                                                                                    |
| <i>IL21R</i> (16p)                                                                         | Lymphocytes and DCs                                        | 615207        | AR (LOF) | CMC (~25%), invasive candidiasis (~15%), PJP (~35%)                                    | Bacterial and viral infections, gastritis, bronchiectasis, cryptosporidiosis with associated cholangitis and liver cirrhosis | Genetic sequencing | Impaired T lymphocyte activation                                                                                   |
| <i>CLEC7A</i> [dectin 1] (12p)                                                             | Myeloid phagocytes and to a lesser extent epithelial cells | 613108        | AR (LOF) | Vaginal candidiasis, onychomycosis, disseminated coccidioidomycosis, phaeohyphomycosis | None                                                                                                                         | Genetic sequencing | Decreased IL-17 generation by PBMC, impaired IL-1 $\beta$ and TNF- $\alpha$ mediated fungal killing by macrophages |
| <b><i>Inborn errors of immunity that manifest with mucocutaneous fungal infections</i></b> |                                                            |               |          |                                                                                        |                                                                                                                              |                    |                                                                                                                    |
| <i>IL17RA</i> (22q)                                                                        | Myeloid cells and epithelial cells                         | 613953        | AR (LOF) | CMC (100%)                                                                             | Skin staphylococcal infections, bacterial pneumonias, eczema                                                                 | Genetic sequencing | Abolished IL-17 cellular responses                                                                                 |
| <i>IL17RC</i> (3p)                                                                         | Epithelial cells                                           | 616445        | AR (LOF) | CMC (100%)                                                                             | None                                                                                                                         | Genetic sequencing | Abolished IL-17 cellular responses                                                                                 |
| <i>IL17F</i> (6p)                                                                          | Innate and adaptive lymphoid cells                         | 613956        | AD (DN)  | CMC (~65%)                                                                             | Asthma                                                                                                                       | Genetic sequencing | Impaired IL-17A/F- and IL-17F-dependent cellular responses                                                         |
| <i>TRAF3IP2</i> [ACT1] (6q)                                                                | Broadly expressed                                          | 615527        | AR (LOF) | CMC (100%)                                                                             | Skin staphylococcal infections, bacterial pneumonias, eczema                                                                 | Genetic sequencing | Abolished IL-17 cellular responses                                                                                 |
| <i>IL12B</i> [IL12p40] (5q)                                                                | Mononuclear phagocytes                                     | 614890 (MSMD) | AR (LOF) | CMC (~5-10%)                                                                           | <i>Salmonella</i> and NTM infections                                                                                         | Genetic sequencing | Impaired T <sub>H</sub> 17 cell differentiation                                                                    |
| <i>RORC</i> [ROR $\gamma$ t] (1q)                                                          | Lymphoid cells and epithelial cells                        | 616622        | AR (LOF) | CMC (~85%)                                                                             | NTM infections                                                                                                               | Genetic sequencing | Impaired T <sub>H</sub> 17 cell differentiation                                                                    |
| <i>MAPK8</i> [JNK1] (10q)                                                                  | Broadly expressed                                          | ND            | AD (HI)  | CMC (100%)                                                                             | Bacterial skin infections, UTI, Ehlers-Danlos syndrome                                                                       | Genetic sequencing | Decreased peripheral blood T <sub>H</sub> 17 cells, impaired IL-17 cellular responses                              |

|                     |                                        |                        |                     |            |                                                                                                                                                                                                                   |                                                           |                                                                                                                                                                                                                                                                                                                                                  |
|---------------------|----------------------------------------|------------------------|---------------------|------------|-------------------------------------------------------------------------------------------------------------------------------------------------------------------------------------------------------------------|-----------------------------------------------------------|--------------------------------------------------------------------------------------------------------------------------------------------------------------------------------------------------------------------------------------------------------------------------------------------------------------------------------------------------|
| <i>ZNF341</i> (20q) | Broadly expressed                      | 618282 (AR-HIES)       | AR (LOF)            | CMC (~65%) | Skin staphylococcal infections, bacterial pneumonias, eczema, pneumatoceles, skeletal abnormalities, elevated IgE                                                                                                 | Genetic sequencing                                        | Decreased peripheral blood T <sub>H</sub> 17 cells                                                                                                                                                                                                                                                                                               |
| <i>MALTI</i> (18q)  | Broadly expressed                      | 615468                 | AR (LOF)            | CMC (~60%) | Bacterial and viral infections, hypogammaglobulinemia, bronchiectasis                                                                                                                                             | Genetic sequencing                                        | Decreased peripheral blood T <sub>H</sub> 17 cells, impaired T lymphocyte activation                                                                                                                                                                                                                                                             |
| <i>BCL10</i> (1p)   | Broadly expressed                      | 616098                 | AR (LOF)            | CMC (~30%) | Bacterial, NTM, and viral infections, gastrointestinal infections, hypogammaglobulinemia                                                                                                                          | Genetic sequencing                                        | Unknown                                                                                                                                                                                                                                                                                                                                          |
| <i>IRF8</i> (16q)   | DCs and to a lesser extent lymphocytes | 226990 (MSMD)          | AR (LOF)            | CMC (~15%) | NTM and viral infections                                                                                                                                                                                          | Genetic sequencing                                        | Decreased peripheral blood T <sub>H</sub> 17 cells                                                                                                                                                                                                                                                                                               |
| <i>STK4</i> (20q)   | Lymphoid and myeloid cells             | 614868                 | AR (LOF)            | CMC (ND)   | Bacterial and viral infections, warts, lymphoproliferative disorders, neutropenia, cardiac malformations                                                                                                          | Genetic sequencing                                        | Unknown                                                                                                                                                                                                                                                                                                                                          |
| <i>AIRE</i> (21q)   | mTECs and eTACs                        | 240300 (APECED, APS-1) | AR (LOF) or AD (DN) | CMC (~85%) | Multiorgan autoimmune manifestations (hypoparathyroidism, adrenal insufficiency, thyroiditis, T1D, hypogonadism, pneumonitis, enteropathy, asplenia, hepatitis, gastritis), ectodermal dystrophy, severe COVID-19 | Genetic sequencing, AAbs to IFN $\alpha$ and IFN $\omega$ | Neutralizing serum AAbs against IL-17A (~30%), IL-17F (~20-80%), and IL-22 (~80%), decreased generation of <i>Candida</i> -specific T <sub>H</sub> 17 cells by mouse eTACs with minimally affected global T <sub>H</sub> 17 response, impaired epithelial barrier integrity caused by excessive IFN $\gamma$ generation by mucosal T lymphocytes |



|                                                                                       |                    |                                    |                     |                                                  |                                                                                                                                               |                                        |                                                                                                                    |
|---------------------------------------------------------------------------------------|--------------------|------------------------------------|---------------------|--------------------------------------------------|-----------------------------------------------------------------------------------------------------------------------------------------------|----------------------------------------|--------------------------------------------------------------------------------------------------------------------|
|                                                                                       |                    |                                    |                     |                                                  | pneumonia, herpetic infections (~10%)                                                                                                         |                                        |                                                                                                                    |
| <i>DOCK8</i> (9p)                                                                     | Broadly expressed  | 243700 (AR-HIES)                   | AR (LOF)            | CMC (~60%)                                       | Viral skin infections, eczema, carcinomas, elevated IgE                                                                                       | Genetic sequencing                     | Impaired T <sub>H</sub> 17 cell differentiation                                                                    |
| <i>ISG15</i> (1p)                                                                     | Broadly expressed  | 616126 (MSMD)                      | AR (LOF)            | Skin aspergillosis (rare)                        | NTM infections, necrotizing skin inflammation, CNS calcifications                                                                             | Genetic sequencing                     | Unknown                                                                                                            |
| <i>IKZF2</i> (2q)                                                                     | Broadly expressed  | ND                                 | AR (LOF) or AD (DN) | CMC (~65%)                                       | Respiratory infections, oral ulcers, lichen planus, thyroiditis, vitiligo, lymphoma                                                           | Genetic sequencing                     | Unknown (normal T <sub>H</sub> 17 cells, increased IFN $\gamma$ generation by T lymphocytes, decreased MAIT cells) |
| <i>ELF4</i> (Xq)                                                                      | Broadly expressed  | 301074                             | X-linked (LOF)      | CMC (~25%)                                       | Bacterial and viral respiratory infections, oral ulcers, gastritis, IBD                                                                       | Genetic sequencing                     | Unknown (increased T <sub>H</sub> 17 cells, enhanced interferon responses)                                         |
| 21q22.3                                                                               | N/A                | 190685 (Down syndrome, trisomy 21) | N/A                 | CMC (~65%)                                       | Autoimmunity, hypothyroidism, congenital cardiac and gastrointestinal defects, mental retardation, leukaemia, early-onset Alzheimer's disease | Genetic sequencing, prenatal screening | Unknown (normal T <sub>H</sub> 17 cells, enhanced IFN $\gamma$ cellular responses)                                 |
| <b><i>Inborn errors of immunity that manifest with invasive fungal infections</i></b> |                    |                                    |                     |                                                  |                                                                                                                                               |                                        |                                                                                                                    |
| <i>CYBB</i> /gp91 <sup>phox</sup> (Xp)                                                | Myeloid phagocytes | 306400 (X-linked CGD)              | X-linked (LOF)      | Aspergillosis (~40%), invasive candidiasis (<5%) | Invasive infections by <i>Nocardia</i> , <i>Staphylococcus</i> , <i>Serratia</i> , and <i>Burkholderia</i> , IBD                              | Genetic sequencing, DHR testing        | Impaired generation of superoxide                                                                                  |
| <i>CYBA</i> [p22 <sup>phox</sup> ] (16q)                                              | Myeloid phagocytes | 233690 (AR-CGD)                    | AR (LOF)            | Aspergillosis (~40%), invasive candidiasis (<5%) | Invasive infections by <i>Nocardia</i> , <i>Staphylococcus</i> ,                                                                              | Genetic sequencing, DHR testing        | Impaired generation of superoxide                                                                                  |
| <i>NCF1</i> [p47 <sup>phox</sup> ] (7q)                                               |                    | 233700 (AR-CGD)                    |                     |                                                  |                                                                                                                                               |                                        |                                                                                                                    |

|                                          |                                                       |                 |          |                                                   |                                                                                                                              |                                                 |                                                                                        |
|------------------------------------------|-------------------------------------------------------|-----------------|----------|---------------------------------------------------|------------------------------------------------------------------------------------------------------------------------------|-------------------------------------------------|----------------------------------------------------------------------------------------|
| <i>NCF2</i> [p67 <sup>phox</sup> ] (1q)  |                                                       | 233710 (AR-CGD) |          |                                                   | <i>Serratia</i> , and <i>Burkholderia</i> , IBD                                                                              |                                                 |                                                                                        |
| <i>CYBC1</i> [EROS] (17q)                | Myeloid phagocytes and to a lesser extent lymphocytes | 618935 (AR-CGD) | AR (LOF) | Invasive candidiasis (<10%)                       | Invasive <i>Burkholderia</i> , <i>Legionella</i> and pneumococcal infections, herpetic infections, AIHA, ILD, IBD            | Genetic sequencing, DHR testing                 | Decreased expression of gp91 <sup>phox</sup> , impaired generation of superoxide       |
| <i>NCF4</i> [p40 <sup>phox</sup> ] (22q) | Myeloid phagocytes                                    | 613960 (AR-CGD) | AR (LOF) | Histoplasmosis (rare)                             | Staphylococcal skin infections, bacterial pneumonias, discoid lupus, periodontitis, ILD, IBD                                 | Genetic sequencing, DHR testing                 | Impaired generation of superoxide in neutrophils (preserved in mononuclear phagocytes) |
| <i>PRKCD</i> [PKD- $\delta$ ] (3p)       | Broadly expressed                                     | 615559          | AR (LOF) | Invasive candidiasis (<10%)                       | Staphylococcal, <i>Legionella</i> and pneumococcal infections, pneumonias, gastroenteritis, herpetic infections, AIHA, lupus | Genetic sequencing                              | Decreased activation of p40 <sup>phox</sup> , impaired generation of superoxide        |
| MPO (17q)                                | Myeloid phagocytes                                    | 254600          | AR (LOF) | Invasive candidiasis (<5%)                        | None                                                                                                                         | Genetic sequencing, MPO staining by FACS or IHC | Impaired generation of hypochlorous acid                                               |
| <i>ELANE</i> (19p)                       | Myeloid phagocytes                                    | 202700 (SCN)    | AD (DN)  | Invasive candidiasis (rare), aspergillosis (rare) | Bacterial infections, AML/MDS, osteopenia, periodontitis                                                                     | Genetic sequencing                              | Neutropenia                                                                            |
| <i>HAX1</i> (1q)                         | Broadly expressed                                     | 610738 (SCN)    | AR (LOF) | Invasive candidiasis (rare), aspergillosis (rare) | Bacterial infections, AML/MDS, neurological abnormalities, periodontitis                                                     | Genetic sequencing                              | Neutropenia                                                                            |

|                           |                                                       |                                    |                |                                                   |                                                                             |                                                                 |                                                                                           |
|---------------------------|-------------------------------------------------------|------------------------------------|----------------|---------------------------------------------------|-----------------------------------------------------------------------------|-----------------------------------------------------------------|-------------------------------------------------------------------------------------------|
| <i>JAGNI</i> (3p)         | Broadly expressed                                     | 616022 (SCN)                       | AR (LOF)       | Invasive candidiasis (rare)                       | Bacterial infections, short stature, teeth, and bone defects, periodontitis | Genetic sequencing                                              | Neutropenia, impaired neutrophil fungicidal activity                                      |
| <i>VPS45</i> (1q)         | Broadly expressed                                     | 615285 (SCN)                       | AR (LOF)       | Aspergillosis (~10-20%)                           | Bacterial infections, myelofibrosis, nephromegaly, periodontitis            | Genetic sequencing                                              | Neutropenia, impaired cell migration                                                      |
| <i>ITGB2</i> [CD18] (21q) | Myeloid phagocytes and to a lesser extent lymphocytes | 116920 (LAD)                       | AR (LOF)       | Invasive candidiasis (rare), aspergillosis (rare) | Severe periodontitis, IBD, impaired wound healing                           | Genetic sequencing, cell surface CD18 expression <sup>b</sup>   | Impaired trafficking of neutrophils to infected tissues                                   |
| <i>CTSC</i> (11q)         | Broadly expressed                                     | 245000 (Papillon-Lefevre syndrome) | AR (LOF)       | Mucormycosis (rare)                               | Bacterial infections, severe periodontitis, palmoplantar keratoderma        | Genetic sequencing                                              | Impaired activation of granule serine proteases                                           |
| <i>CSF2RA</i> (Xp)        | Myeloid phagocytes and epithelial cells               | 300770                             | X-linked (LOF) | Cryptococcosis and aspergillosis (~5%)            | PAP, bacterial, NTM, and <i>Nocardia</i> pulmonary infections               | Genetic sequencing                                              | Impaired GM-CSF cellular responses                                                        |
| <i>CSF2RB</i> (22q)       | Myeloid phagocytes, lymphocytes, and epithelial cells | 614370                             | AR (LOF)       | Cryptococcosis and aspergillosis (~5%)            | PAP, bacterial, NTM, and <i>Nocardia</i> pulmonary infections               | Genetic sequencing                                              | Impaired GM-CSF cellular responses                                                        |
| <i>IFNGR1</i> (6q)        | Broadly expressed                                     | 209950 (AR-MSMD)                   | AR (LOF)       | Histoplasmosis (rare), coccidioidomycosis (rare)  | <i>Salmonella</i> and NTM infections                                        | Genetic sequencing, cell surface IFNGR1 expression <sup>b</sup> | Impaired IFN $\gamma$ cellular responses                                                  |
|                           |                                                       | 615978 (AD-MSMD)                   | AD (DN)        |                                                   |                                                                             |                                                                 |                                                                                           |
| <i>STAT3</i> (17q)        | Broadly expressed                                     | ND                                 | AD (HI)        | Sino-orbital aspergillosis                        | Allergic rhinitis                                                           | Genetic sequencing                                              | Unknown                                                                                   |
| <i>STAT4</i> (2q)         | Lymphoid cells and DCs                                | ND                                 | AD (DN)        | paracoccidioidomycosis                            | None                                                                        | Genetic sequencing                                              | Impaired IL-12–dependent IFN $\gamma$ generation, impaired macrophage fungicidal activity |

|                    |                                                                             |                                              |               |                                                                                                                               |                                                                                                                                                         |                                             |                                                                                   |
|--------------------|-----------------------------------------------------------------------------|----------------------------------------------|---------------|-------------------------------------------------------------------------------------------------------------------------------|---------------------------------------------------------------------------------------------------------------------------------------------------------|---------------------------------------------|-----------------------------------------------------------------------------------|
| <i>GATA2</i> (3q)  | Neutrophils and to a lesser extent mononuclear phagocytes and T lymphocytes | 614172 (MonoMAC syndrome, Emberger syndrome) | AD (HI)       | Aspergillosis (~10%), cryptococcosis (~5%), histoplasmosis (~5%), coccidioidomycosis (rare), blastomycosis (rare), PJP (rare) | Viral and NTM infections, PAP, MDS, leukaemia, lymphedema                                                                                               | Genetic sequencing, bone marrow examination | Decreased monocyte and DC counts, neutrophil granule abnormalities                |
| <i>IKZF1</i> (7p)  | Myeloid and lymphoid cells                                                  | 616873                                       | AD (HI or DN) | PJP (~20%), aspergillosis (~10%)                                                                                              | Bacterial sinopulmonary and CNS infections, herpetic and NTM infections, leukaemia, autoimmune manifestations (ITP, AIHA, lupus), hypogammaglobulinemia | Genetic sequencing                          | Neutropenia, impaired T lymphocyte proliferation and memory phenotype acquisition |
| <i>IKZF3</i> (17q) | Lymphoid cells and DCs                                                      | 619437                                       | AD (DN)       | PJP (~50%)                                                                                                                    | Sinopulmonary infections, hypogammaglobulinemia, bronchiectasis, NTM infections, warts, leukaemia, lymphoma                                             | Genetic sequencing                          | Impaired CD40L expression on T lymphocytes, impaired Th1 differentiation          |
| <i>BTK</i> (Xq)    | B cells and myeloid phagocytes                                              | 300755 (XLA)                                 | X-linked      | PJP (rare), cryptococcosis (rare), aspergillosis (rare)                                                                       | Bacterial infections, agammaglobulinemia IBD                                                                                                            | Genetic sequencing                          | Impaired B lymphocyte signaling                                                   |

<sup>a</sup>OMIM, Online Mendelian Inheritance in Man. <sup>b</sup>By fluorescence-activated cell sorting. AD, autosomal dominant; AIHA, autoimmune hemolytic anemia; AIRE, autoimmune regulator; AML, acute myelogenous leukaemia; APECED, autoimmune polyendocrinopathy-candidiasis-ectodermal dystrophy; APS-1, autoimmune polyglandular syndrome type-1; AR, autosomal recessive; BCL10, B-cell lymphoma/leukaemia 10; BTK, Bruton's tyrosine kinase; CARD9, Caspase recruitment domain-containing protein 9; CGD, chronic granulomatous disease; CMC, chronic mucocutaneous candidiasis; CNS, central nervous system; COVID-19, coronavirus disease 2019; CSF2R, colony stimulating factor 2 receptor; CTSC, cathepsin C; CYB, cytochrome b-245; CYCB1, cytochrome b-245 chaperone 1; DCLRE1C, DNA cross-link repair 1C; DCs, dendritic cells; DHR, dihydrorhodamine; DN, dominant negative; DOCK8, dedicator of cytokinesis 8; ELANE, elastase, neutrophil expressed; ELF4, E74 like ETS transcription factor 4; EDA-ID, anhidrotic ectodermal dysplasia with immune deficiency; eTACs, extrathymic AIRE-expressing cells; FACS, fluorescence-activated cell sorting; GM-CSF, granulocyte macrophage-colony stimulating factor; GOF, gain of function; GvHD, graft-versus-host disease; HAX1, HCLS1 associated protein X-1; HI, haploinsufficiency; HIES, hyper-IgE syndrome; HIGM, hyper-IgM syndrome; IBD, inflammatory bowel disease; IFN, interferon; IHC, immunohistochemistry; IKBKG, inhibitor of NF-κB kinase regulatory subunit gamma; IKZF, IKAROS family zinc finger; ILD, interstitial lung disease; IP, incomplete penetrance; IRF8, interferon regulatory factor 8; ISG15, interferon-stimulated gene 15; ITP, immune thrombocytopenic purpura; JAGN1,

Jagunal homolog 1; JAK, Janus kinase; LAD, leukocyte adhesion deficiency; LOF, loss of function; MAIT, Mucosal-associated invariant T; MALT1, mucosa-associated lymphoid tissue lymphoma translocation 1; MAPK8, mitogen-activated protein kinase 8; MDS, myelodysplastic syndrome; MPO, myeloperoxidase; MSMD, mendelian susceptibility to mycobacterial disease; mTECs, medullary thymic epithelial cells; N/A, not applicable; NBS, newborn screening; NCF, neutrophil cytosolic factor; ND, not defined; NFKBIA, NF- $\kappa$ B inhibitor alpha; NTM, non-tuberculous mycobacteria; OMIM, online mendelian inheritance in man; PAP, pulmonary alveolar proteinosis; PBMC, peripheral blood mononuclear cells; PJP, *Pneumocystis jirovecii* pneumonia; PRKCD, protein kinase C delta; RAG, recombination activating gene; SCID, severe combined immunodeficiency; RORC, RAR related orphan receptor C; SCN, severe congenital neutropenia; STAT, signal transducer and activator of transcription; STK4, serine/threonine kinase 4; T1D, type 1 diabetes; T<sub>H</sub>17, T helper 17; TRAF3IP2, TRAF3 interacting protein 2; UTI, urinary tract infection; VPS45, vacuolar protein sorting 45 homolog; XLA, X-linked agammaglobulinemia; ZAP70, zeta chain of T cell receptor associated protein kinase; ZNF341, zinc finger protein 341.

Supplementary Table 3 | Key FDA-approved immune-targeted biologics associated with the development of human fungal infections

| Molecular target                                                                                          | Name of biologic | Type of biologic                                                    | Approved indications   | Fungal infection susceptibility                                             | Risk of fungal infection (mean frequency, when known) | Non-fungal infection susceptibility                                                    | Antifungal immunological defects (when known)                                                         |
|-----------------------------------------------------------------------------------------------------------|------------------|---------------------------------------------------------------------|------------------------|-----------------------------------------------------------------------------|-------------------------------------------------------|----------------------------------------------------------------------------------------|-------------------------------------------------------------------------------------------------------|
| <b><i>Biologics that promote the development of both mucocutaneous and invasive fungal infections</i></b> |                  |                                                                     |                        |                                                                             |                                                       |                                                                                        |                                                                                                       |
| TNF                                                                                                       | Infliximab       | Mouse-human chimeric IgG1k mAb                                      | RA, AS, psoriasis, IBD | Histoplasmosis, coccidioidomycosis, blastomycosis, PJP                      | Moderate/high                                         | Mycobacterial infections (including disseminated TB)                                   | Impaired IFN $\gamma$ generation and granuloma formation; impaired phagocyte trafficking and function |
|                                                                                                           | Etanercept       | p75 TNF- $\alpha$ soluble receptors fused to the Fc portion of IgG1 |                        |                                                                             |                                                       |                                                                                        |                                                                                                       |
|                                                                                                           | Adalimumab       | Humanized IgG1k mAb                                                 |                        | Mucosal candidiasis, invasive candidiasis, aspergillosis, phaeohyphomycosis | Low (<5%)                                             |                                                                                        |                                                                                                       |
|                                                                                                           | <b>Golimumab</b> | Humanized IgG1k mAb                                                 |                        |                                                                             |                                                       |                                                                                        |                                                                                                       |
| CD52                                                                                                      | Alemtuzumab      | Humanized IgG1k mAb                                                 | MS, CLL                | Cryptococcosis, PJP, mucosal candidiasis                                    | Moderate/high                                         | Herpetic infections, CMV reactivation, toxoplasmosis, nocardiosis, bacterial pneumonia | Prolonged and profound T lymphocytopenia                                                              |
| C-RAF/B-RAF                                                                                               | Sorafenib        | Dual kinase inhibitor                                               | RCC, HCC               | Aspergillosis, mucosal candidiasis, skin fungal infection                   | Low                                                   | Bacterial pneumonia                                                                    | Impaired ERK signaling Impaired T lymphocyte responses                                                |
| <b><i>Biologics that promote the development of mucocutaneous fungal infections</i></b>                   |                  |                                                                     |                        |                                                                             |                                                       |                                                                                        |                                                                                                       |
| IL-17A                                                                                                    | Ixekizumab       | Humanized IgG4 mAb                                                  | Psoriasis, AS, IBD     | Mucosal candidiasis                                                         | Low/moderate (~2-12% depending on the biologic)       | None                                                                                   | Impaired IL-17 cellular responses                                                                     |
|                                                                                                           | Secukinumab      | Humanized IgG1k mAb                                                 |                        |                                                                             |                                                       |                                                                                        |                                                                                                       |
| IL-17RA                                                                                                   | Brodalumab       | Humanized IgG2 mAb                                                  |                        |                                                                             |                                                       |                                                                                        |                                                                                                       |
| IL-12p40                                                                                                  | Ustekinumab      | Humanized IgG1k mAb                                                 |                        |                                                                             |                                                       |                                                                                        |                                                                                                       |
| IL-23p19                                                                                                  | Risankizumab     | Humanized IgG1k mAb                                                 |                        |                                                                             |                                                       |                                                                                        |                                                                                                       |
|                                                                                                           | Guselkumab       | Humanized IgG1 $\lambda$ mAb                                        |                        |                                                                             |                                                       |                                                                                        |                                                                                                       |
|                                                                                                           | Tildrakizumab    | Humanized IgG1k mAb                                                 |                        |                                                                             |                                                       |                                                                                        |                                                                                                       |
| SYK                                                                                                       | Fostamatinib     | Kinase inhibitor                                                    | ITP                    | Vaginal candidiasis, skin fungal infection                                  | Low/moderate (up to ~10%)                             | Upper respiratory infections                                                           | Impaired IL-17 cellular responses                                                                     |

| <b>Biologics that promote the development of invasive fungal infections</b> |                                                                 |                                |                           |                                                                                                                    |                       |                                                |                                                                                                                                     |
|-----------------------------------------------------------------------------|-----------------------------------------------------------------|--------------------------------|---------------------------|--------------------------------------------------------------------------------------------------------------------|-----------------------|------------------------------------------------|-------------------------------------------------------------------------------------------------------------------------------------|
| JAK1/2/3                                                                    | Ruxolitinib, tofacitinib, baricitinib, upadacitinib, fedratinib | Kinase inhibitors              | MF, PV, GvHD, RA, IBD     | Histoplasmosis, coccidioidomycosis, cryptococcosis, talaromycosis, PJP, aspergillosis                              | Moderate/high         | Herpetic, CMV, and mycobacterial infections    | Impaired IFN $\gamma$ and IFN $\lambda$ cellular responses, impaired lymphocyte and monocyte/macrophage activation, lymphocytopenia |
| IFN $\gamma$                                                                | Emapalumab                                                      | Humanized IgG1 mAb             | HLH                       | Histoplasmosis, coccidioidomycosis, PJP                                                                            | Moderate/high         | Viral, bacterial, and mycobacterial infections | Impaired IFN $\gamma$ cellular responses                                                                                            |
| BTK                                                                         | Ibrutinib, acalabrutinib, zanubrutinib                          | Kinase inhibitors              | CLL, MZL, MCL, WM, GvHD   | Aspergillosis (with CNS involvement), mucormycosis, fusariosis, cryptococcosis, histoplasmosis, blastomycosis, PJP | Moderate/high         | Viral and bacterial infections                 | Impaired myeloid phagocyte activation and function                                                                                  |
| BCL-2                                                                       | Venetoclax                                                      | BH3-mimetic                    | AML, CLL                  | Invasive candidiasis, aspergillosis, PJP                                                                           | Low                   | Bacterial infections                           | Unknown                                                                                                                             |
| C5a                                                                         | Eculizumab                                                      | Humanized IgG2/4k mAb          | PNH, HUS                  | Invasive candidiasis, aspergillosis                                                                                | Moderate (up to ~10%) | Infections by encapsulated bacteria            | Impaired myeloid phagocyte activation and function                                                                                  |
| CD20                                                                        | Rituximab                                                       | Mouse-human chimeric IgG1k mAb | RA, CLL, lymphomas        | PJP                                                                                                                | Low                   | Bacterial infections, PML                      | B lymphocytopenia and impaired T lymphocyte responses against <i>Pneumocystis</i>                                                   |
| IL-6R                                                                       | Tocilizumab                                                     | Humanized IgG1k mAb            | RA, CRS after CAR T cells | Invasive candidiasis, cryptococcosis, coccidioidomycosis, PJP                                                      | Low                   | Bacterial infections                           | Impaired myeloid phagocyte trafficking and activation                                                                               |
| S1PR                                                                        | Fingolimod                                                      | Aminodiol                      | MS                        | Cryptococcosis                                                                                                     | Low                   | Herpetic and respiratory infections            | Impaired T macrophage phagocytosis and killing, and defective granuloma formation                                                   |

|              |             |                                           |                                       |                                                          |                   |                                                         |                                                                    |
|--------------|-------------|-------------------------------------------|---------------------------------------|----------------------------------------------------------|-------------------|---------------------------------------------------------|--------------------------------------------------------------------|
| PI3K (p110δ) | Idelalisib  | Kinase inhibitor                          | CLL, lymphomas                        | PJP                                                      | Moderate (~5-10%) | CMV infections, bacterial pneumonia                     | Impaired T lymphocyte activation                                   |
| BCR/ABL      | Dasatinib   | Kinase inhibitor                          | CML                                   | PJP                                                      | Low/moderate      | Herpetetic and CMV infections, hepatitis B reactivation | Impaired T lymphocyte activation                                   |
| α4 integrin  | Natalizumab | Humanized IgG4k mAb                       | MS                                    | Cryptococcosis                                           | Low               | PML                                                     | Impaired T lymphocyte trafficking                                  |
| CTLA-4       | Abatacept   | Chimeric CTLA4 and IgG1 Fc fusion protein | RA                                    | Invasive candidiasis, aspergillosis, histoplasmosis, PJP | Low               | Bacterial infections                                    | Impaired CD80/CD86:CD28 co-stimulation and T lymphocyte activation |
| VEGF         | Bevacizumab | Humanized IgG1 mAb                        | Colorectal, lung, and cervical cancer | Aspergillosis, fusariosis, PJP                           | Low               | Bacterial infections                                    | Unknown                                                            |

AML, acute myelogenous leukaemia; AS, ankylosing spondylitis; BCL-2, B cell lymphoma 2; BTK, Bruton's tyrosine kinase; CAR, chimeric antigen receptor; CLL, chronic lymphocytic leukaemia; CML, chronic myelogenous leukaemia; CMV, cytomegalovirus; CNS, central nervous system; CRS, cytokine release syndrome; CTLA-4, cytotoxic T-lymphocyte associated protein 4; ERK, extracellular *signal*-regulated kinase; GvHD, graft-versus-host disease; HCC, hepatocellular carcinoma; HLH, *hemophagocytic lymphohistiocytosis*; HUS, hemolytic uremic syndrome; IBD, inflammatory bowel disease; IFN, interferon; ITP, immune thrombocytopenic purpura; JAK, Janus kinase; mAb, monoclonal antibody; MCL, mantle cell lymphoma; MF, myelofibrosis; MS, multiple sclerosis; MZL, marginal zone lymphoma; PI3K, phosphoinositide 3-kinase; PJP, *Pneumocystis jirovecii* pneumonia; PML, progressive multifocal leukoencephalopathy; PNH, paroxysmal nocturnal hemoglobinuria; PV, polycythemia vera; RA, rheumatoid arthritis; RAF, rapidly accelerated fibrosarcoma; RCC, renal cell carcinoma; S1PR, sphingosine 1 phosphate receptor; SYK, spleen tyrosine kinase; TB, tuberculosis; TNF, tumor necrosis factor; VEGF, vascular endothelial growth factor; WM, Waldenström's macroglobulinemia.
